# Supplementary material
Source: publisher site journal article supplement (https://www.dovepress.com/article/584545)
Supplement: Supplementary file 1 [file 584545%20Supplementary%20Material%201.docx]

**Supplementary Material 1: Nebulization Administration Procedure**

The patient presents with a prescription for nebulized inhalation therapy issued by a physician. The prescription clearly specifies the medications to be used, such as bronchodilators and/or inhaled corticosteroids. The patient collects the prescribed medications and necessary equipment from the pharmacy. Upon arrival at the hospital's nebulization therapy room, the patient registers with the nursing staff and presents the treatment order. The nurse verifies the patient's identity, medication names, and dosages. For first-time treatments, the nurse provides detailed instructions on the procedure, proper mouth-breathing technique, and potential sensations during administration (e.g., medication taste, mild palpitations). The nurse also inquiries about any history of drug allergies. Following strict aseptic technique, the nurse or pharmacist prepares the medication by transferring the solution into the nebulizer's medication cup. The nebulizer is then connected to the hospital's oxygen-driven apparatus. The patient places the mouthpiece gently between the teeth, forming a tight seal with the lips to prevent aerosol leakage. The patient is instructed to inhale slowly and deeply through the mouth, hold the breath for 1-2 seconds at the end of inhalation, and then exhale slowly through the nose. A single nebulization treatment typically lasts 10-15 minutes, continuing until the medication cup is empty and aerosol generation ceases.
